# Supplementary material for: Monocyte Subsets and Serum Inflammatory and Bone-Associated Markers in Monoclonal Gammopathy of Undetermined Significance and Multiple Myeloma
Source: PubMed Central journal article supplement (PMC8004952; doi:10.3390/cancers13061454), 2021-03-22
Supplement: cancers-13-01454-s001.pdf [file cancers-13-01454-s001.pdf]

## Supplementary Materials: Monocyte Subsets and Serum Inflammatory and Bone-Associated Markers in Monoclonal Gammopathy of Undetermined Significance and Multiple Myeloma

Daniela Damasceno, Julia Almeida, Cristina Teodosio, Luzalba Sanoja-Flores, Andrea Mayado, Alba Pérez-Pons, Noemi Puig, Paula Arana, Bruno Paiva, Fernando Solano, Alfonso Romero, Sergio Matarraz, Wouter B.L. van den Bossche, Juan Flores-Montero, Brian Durie, Jacques J.M. van Dongen and Alberto Orfao on behalf of the TiMaScan Study Group

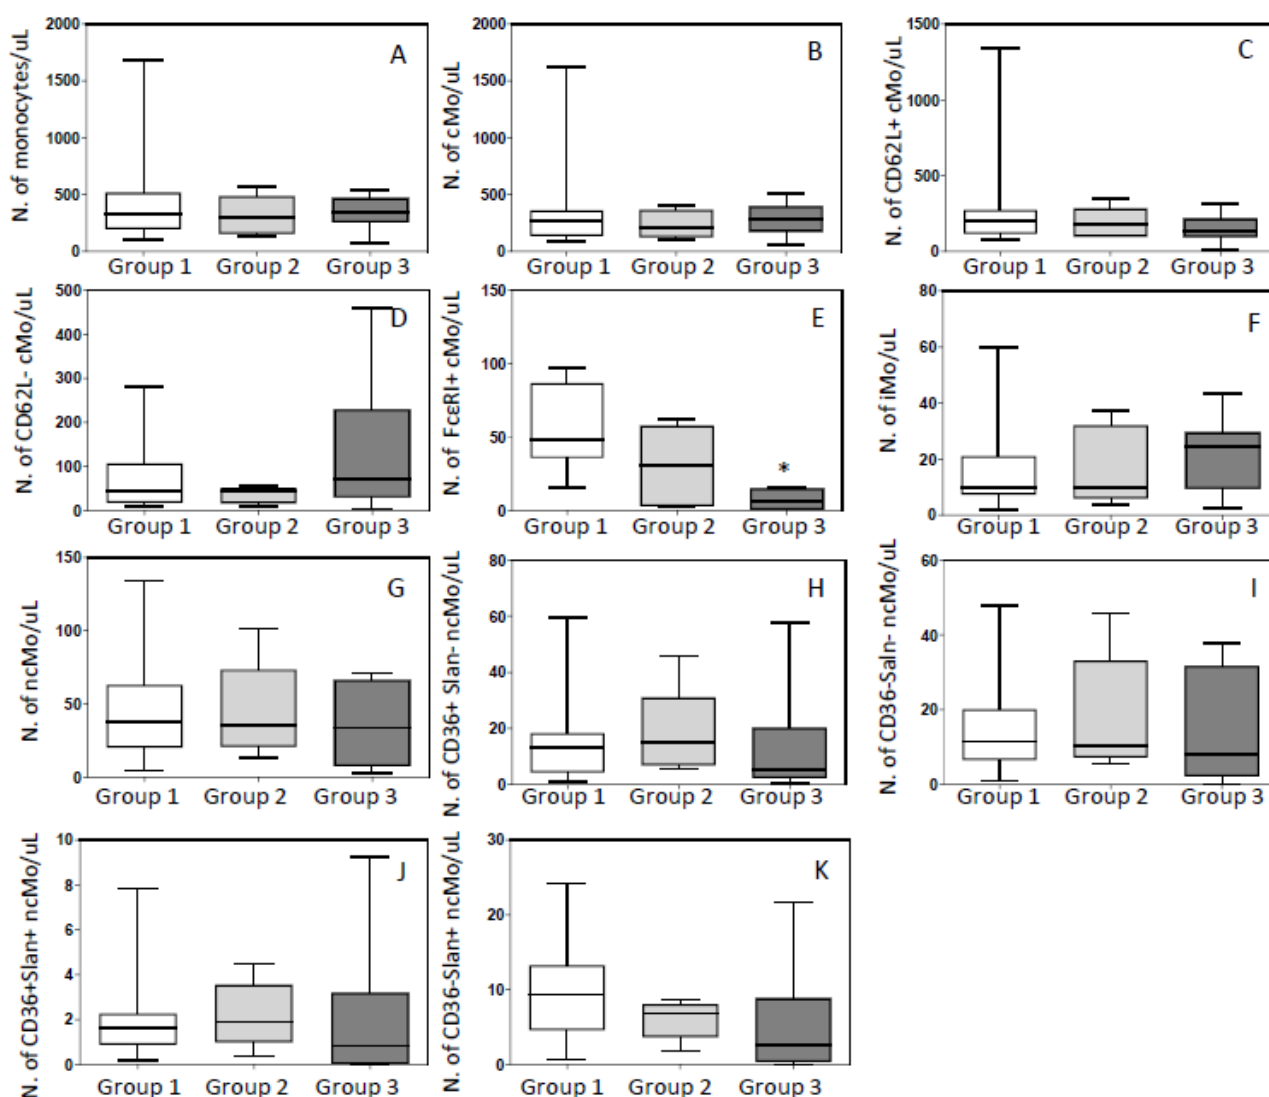

**Figure S1.** Distribution of total monocytes (panel A) and monocyte subsets (panels B-K) in blood of 4 MGUS, 5 SMM, 16 MM and 5 HD grouped by TSNE (groups 1, 2 and 3). Notched boxes extend from the 25th to the 75th percentile values; the lines in the middle and vertical lines correspond to median values and the 5th and 95th percentiles, respectively. Statistical significant differences ( $p < 0.05$ ) were observed vs \*Group 1. cMo: classical monocytes; iMo: intermediate monocytes; ncMo: non-classical monocytes.

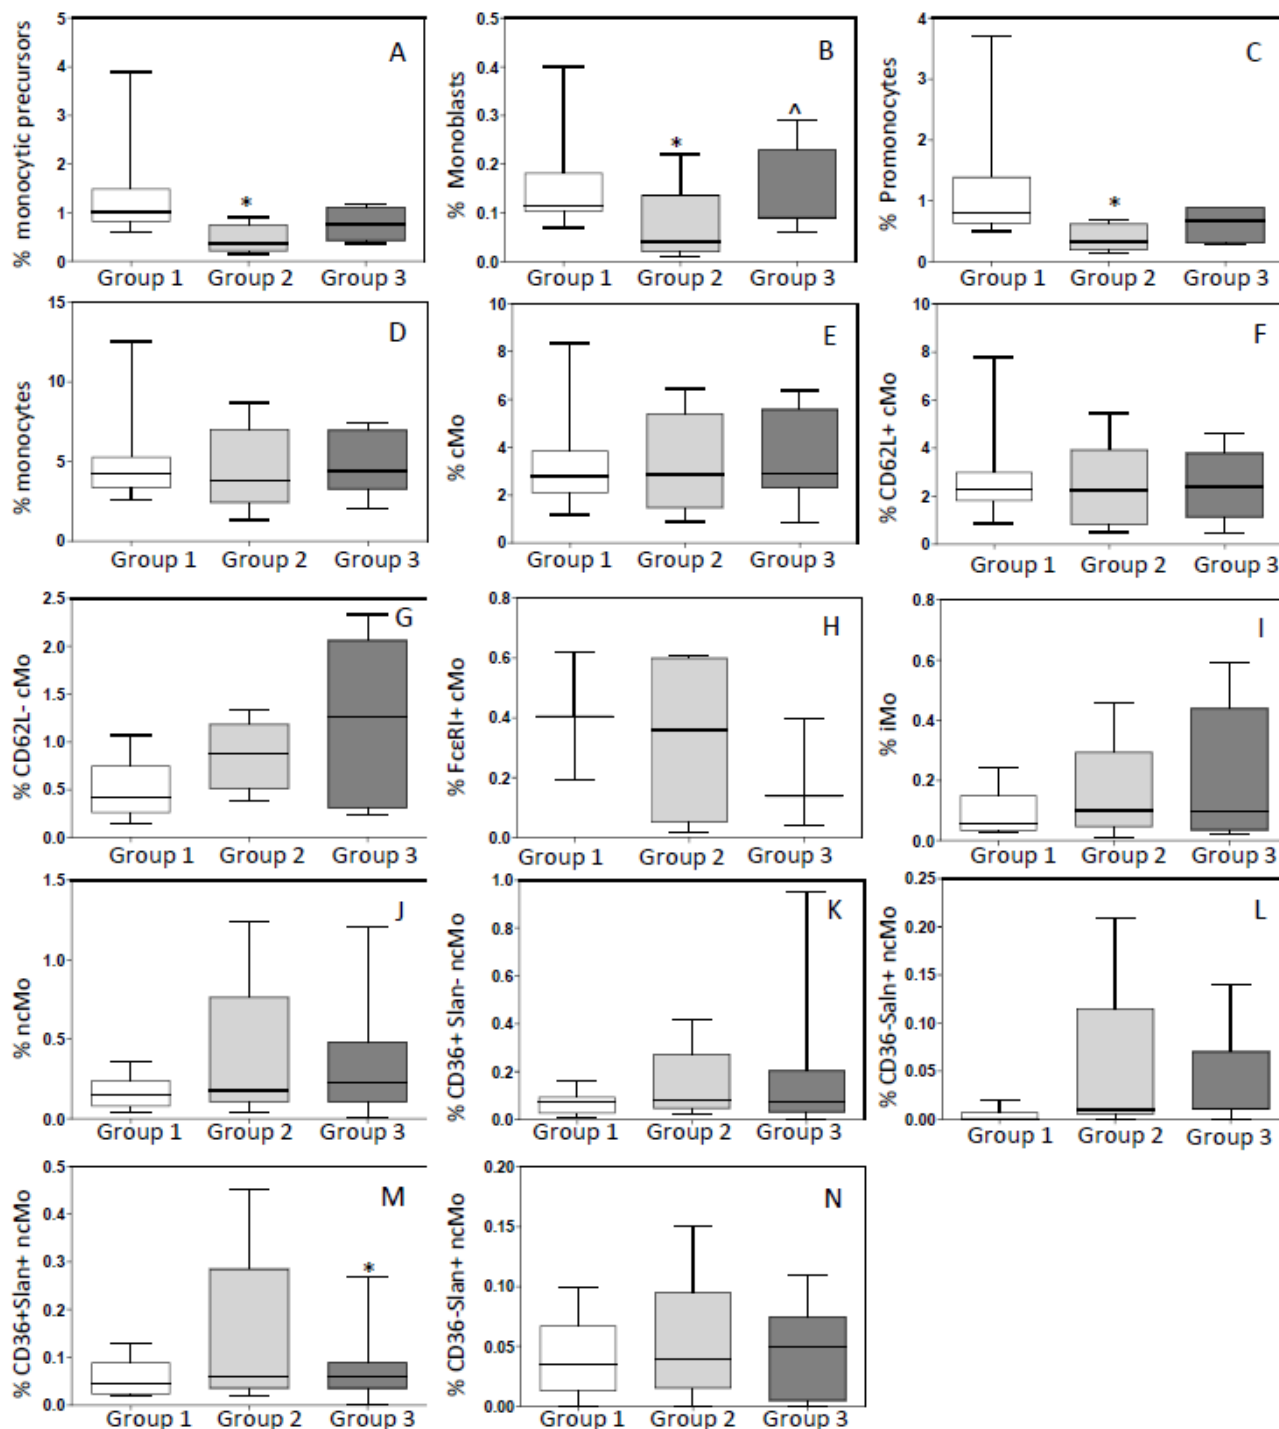

**Figure S2.** Distribution of monocytic precursors (total precursors, monoblasts and promonocytes) (panels A-C), total monocytes (panel D) and their subsets (panels E-N) in bone marrow of 4 MGUS, 5 SMM, 16 MM and 5 HD grouped by T-SNE (groups 1, 2 and 3). Notched boxes extend from the 25th to the 75th percentile values; the lines in the middle and vertical lines correspond to median values and the 5th and 95th percentiles, respectively. Statistical significant differences ( $p < 0.05$ ) were observed vs \*Group 1 and ^Group 2. cMo: classical monocytes; iMo: intermediate monocytes; ncMo: non-classical monocytes.

**Table S1.** Clinical characteristics of MGUS, SMM and MM patients and HD.

| Patient Characteristics                              | HD                |            | MGUS              |            | SMM              |            | MM                |            |
|------------------------------------------------------|-------------------|------------|-------------------|------------|------------------|------------|-------------------|------------|
|                                                      | PB                | BM         | PB                | BM         | PB               | BM         | PB                | BM         |
| Number of cases                                      | 97                | 15         | 22                | 19         | 13               | 13         | 88                | 81         |
| Age, years, median (range)                           | 62 (32-92)        | 59 (31-83) | 67 (31-85)        | 70 (44-85) | 64 (43-86)       | 63 (43-86) | 72 (45-85)        | 71 (45-85) |
| Sex, males/females, (%)                              | 50/50             | 66/34      | 54/46             | 58/42      | 38/62            | 54/46      | 47/53             | 42/58      |
| MM ISS stage, I/II/III, (%)                          |                   |            |                   |            |                  |            |                   | 37/23/40   |
| MM R-ISS stage, I/II/III, (%)                        |                   |            |                   |            |                  |            |                   | 25/54/21   |
| Mayo Clinic risk score, 0/1/2/3, (%)                 |                   |            |                   | 26/26/42/6 |                  | 23/61/16/0 |                   |            |
| Osteolytic lesions, No/Yes, (%)                      |                   |            |                   | 100/0      |                  | 100/0      |                   | 44/56      |
| Leukocytes (WBC), cells/ $\mu$ L, median (range)     | 8310 (6120-10390) |            | 6582 (4078-10147) |            | 5885 (5346-6483) |            | 5641 (2721-10907) |            |
| Hemoglobin, g/dL, median (range)                     | NA                |            | 15 (12-18)        |            | 13 (12-16)       |            | 11 (6-17)         |            |
| Serum calcium, mg/dL, median (range)                 | NA                |            | 9.4 (8.7-9.8)     |            | 9.4 (8.7-10)     |            | 9.3 (7.2-14)      |            |
| Serum creatinine, mg/dL, median (range)              | NA                |            | 0.8 (0.5-2.2)     |            | 0.8 (0.6-1.1)    |            | 0.99 (0.3-6.5)    |            |
| Urea, mg/dL, median (range)                          | NA                |            | 33 (17-54)        |            | 41 (31-55)       |            | 47 (20-231)       |            |
| Serum albumin, g/dL, median (range)                  | NA                |            | NA                |            | 4.3 (3.5-4.8)    |            | 4.1 (2.1-9)       |            |
| Serum $\beta$ 2-microglobulin, mg/dL, median (range) | NA                |            | NA                |            | 2.6 (1.1-4.3)    |            | 3.7 (1.3-52)      |            |
| Serum M-component (g/L)                              | NA                |            | 0.6 (0-2.2)       |            | 1.6 (0.6-3.1)    |            | 3.4 (1.6-1161)    |            |
| Heavy chain, IgA/IgG, (%)                            |                   |            |                   | 35/65      |                  | 38/62      |                   | 30/70      |
| Light chain, $\kappa/\lambda$ , (%)                  |                   |            |                   | 45/55      |                  | 62/38      |                   | 74/26      |
| Number of plasma samples analyzed                    | 13                |            | 18                |            | 7                |            | 12                |            |

\*all patients were studied at diagnosis prior to any treatment.

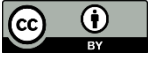

**Copyright:** © 2021 by the authors. Licensee MDPI, Basel, Switzerland. This article is an open access article distributed under the terms and conditions of the Creative Commons Attribution (CC BY) license (<http://creativecommons.org/licenses/by/4.0/>).
